# Supplementary material
Source: publisher site journal article supplement (https://studysites.sagepub.com/gribben/Web%20Material%20(Appendix)/Gribben_Web%20Material%20(Appendix)_Ch-02.pdf)
Supplement: Supplementary file 1 [file Gribben_Web%20Material%20(Appendix)_Ch-02.pdf]

## **Appendix 2: Activity 1.4 Answers**

Choose a task to explain your experience so far:

- write a letter to a friend = auditory
- design a poster or create an object = tactile
- draw a picture = visual
